# Supplementary material for: A Mobile Technology Intervention With Ultraviolet Radiation Dosimeters and Smartphone Apps for Skin Cancer Prevention in Young Adults: Randomized Controlled Trial
Source: PubMed Central journal article supplement (PMC6291679; doi:10.2196/mhealth.9854), 2018-11-28
Supplement: mhealth_v6i11e199_app4.pdf [file mhealth_v6i11e199_app4.pdf]

**Table S1 Mean Sun Protection Habits**

| <b>Sun Protection Habits (SPH)</b>             | <b>Baseline<br/>n=124<br/>Mean<sup>a</sup> (SE)</b> | <b>1 week after the<br/>intervention<br/>n=109<br/>Mean* (SE)</b> | <b>3 months after<br/>the intervention<br/>n=107<br/>Mean* (SE)</b> |
|------------------------------------------------|-----------------------------------------------------|-------------------------------------------------------------------|---------------------------------------------------------------------|
| Wear a long shirt with sleeves                 |                                                     |                                                                   |                                                                     |
| Control                                        | 2.94 (0.14)                                         | 2.95 (0.14)                                                       | 2.84 (0.14)                                                         |
| SunSmart App                                   | 3.04 (0.15)                                         | 2.73 (0.16)                                                       | 2.89 (0.16)                                                         |
| UVR monitor                                    | 3.06 (0.16)                                         | 2.81 (0.18)                                                       | 2.69 (0.16)                                                         |
| Wear Sunglasses                                |                                                     |                                                                   |                                                                     |
| Control                                        | 2.34 (0.13)                                         | 2.24 (0.14)                                                       | 2.67 (0.12)                                                         |
| SunSmart App                                   | 2.18 (0.17)                                         | 2.13 (0.18)                                                       | 2.48 (0.15)                                                         |
| UVR monitor                                    | 2.11 (0.19)                                         | 2.34 (0.18)                                                       | 2.29 (0.19)                                                         |
| Stay in the shade                              |                                                     |                                                                   |                                                                     |
| Control                                        | 2.80 (0.10)                                         | 2.92 (0.10)                                                       | 2.97 (0.10)                                                         |
| SunSmart App                                   | 2.87 (0.13)                                         | 2.86 (0.12)                                                       | 3.04 (0.11)                                                         |
| UVR monitor                                    | 2.71 (0.11)                                         | 2.86 (0.13)                                                       | 3.04 (0.12)                                                         |
| Use sunscreen                                  |                                                     |                                                                   |                                                                     |
| Control                                        | 2.12 (0.12)                                         | 1.88 (0.11)                                                       | 2.01 (0.10)                                                         |
| SunSmart App                                   | 2.01 (0.15)                                         | 2.18 (0.15)                                                       | 2.22 (0.15)                                                         |
| UVR monitor                                    | 2.03 (0.16)                                         | 2.20 (0.18)                                                       | 2.26 (0.17)                                                         |
| Limit your time in the sun during midday hours |                                                     |                                                                   |                                                                     |
| Control                                        | 2.67 (0.14)                                         | 2.83 (0.14)                                                       | 2.77 (0.13)                                                         |
| SunSmart App                                   | 2.83 (0.15)                                         | 2.84 (0.15)                                                       | 2.99 (0.14)                                                         |
| UVR monitor                                    | 2.72 (0.14)                                         | 2.86 (0.17)                                                       | 2.98 (0.14)                                                         |
| Wear a hat                                     |                                                     |                                                                   |                                                                     |
| Control                                        | 1.61 (0.11)                                         | 1.32 (0.10)                                                       | 1.66 (0.11)                                                         |
| SunSmart App                                   | 1.83 (0.15)                                         | 1.71 (0.14)                                                       | 2.06 (0.15)                                                         |
| UVR monitor                                    | 1.52 (0.15)                                         | 1.48 (0.13)                                                       | 1.73 (0.15)                                                         |
| SPH Index (above items combined)               |                                                     |                                                                   |                                                                     |
| Control                                        | 2.42 (0.08)                                         | 2.35 (0.07)                                                       | 2.48 (0.07)                                                         |
| SunSmart App                                   | 2.47 (0.07)                                         | 2.41 (0.08)                                                       | 2.61 (0.07)                                                         |
| UVR monitor                                    | 2.36 (0.08)                                         | 2.42 (0.09)                                                       | 2.49 (0.08)                                                         |

Scale: 1=never/rarely 2=sometimes 3=often 4=always

<sup>a</sup>mean= Estimated Marginal Means from GEE model

**Table S2 Proportion of participants who improved their use of sunscreen**

| Timepoint                                          | Yes <sup>a</sup><br>% (n) | No<br>% (n) | OR    | (95% CI)       | p-value |
|----------------------------------------------------|---------------------------|-------------|-------|----------------|---------|
| <b>During Intervention<sup>b</sup></b>             |                           |             |       |                |         |
| <b>Sunscreen Use over weekday and weekend</b>      |                           |             |       |                |         |
| Control                                            | 19.4 (7)                  | 80.6 (29)   | 1.00  |                | ref     |
| SunSmart App                                       | 30.6 (11)                 | 69.4 (25)   | 1.491 | (0.482, 4.608) | 0.488   |
| UVR monitor                                        | 13.2 (5)                  | 86.8 (33)   | 0.637 | (0.181, 2.238) | 0.482   |
| <b>Sunscreen Use Weekday</b>                       |                           |             |       |                |         |
| Control                                            | 19.4 (7)                  | 80.6 (29)   | 1.00  |                | ref     |
| SunSmart App                                       | 33.3 (12)                 | 66.7 (24)   | 1.900 | (0.635, 5.684) | 0.251   |
| UVR monitor                                        | 26.3 (10)                 | 73.7 (28)   | 1.480 | (0.494, 4.434) | 0.484   |
| <b>Sunscreen Use Weekend</b>                       |                           |             |       |                |         |
| Control                                            | 27.8 (10)                 | 72.2 (26)   | 1.00  |                | ref     |
| SunSmart App                                       | 36.1 (13)                 | 63.9 (23)   | 1.206 | (0.427, 3.408) | 0.724   |
| UVR monitor                                        | 18.4 (7)                  | 81.6 (31)   | 0.593 | (0.190, 1.850) | 0.368   |
| <b>1 week after the intervention<sup>c</sup></b>   |                           |             |       |                |         |
| <b>Sunscreen Use over weekday and weekend</b>      |                           |             |       |                |         |
| Control                                            | 21.6 (8)                  | 78.4 (29)   | 1.00  |                | ref     |
| SunSmart App                                       | 33.3 (12)                 | 66.7 (24)   | 1.508 | (0.513, 4.435) | 0.456   |
| UVR monitor                                        | 13.5 (5)                  | 86.5 (32)   | 0.562 | (0.164, 1.930) | 0.360   |
| <b>Sunscreen Use Weekday</b>                       |                           |             |       |                |         |
| Control                                            | 13.5 (5)                  | 86.5 (32)   | 1.00  |                | ref     |
| SunSmart App                                       | 33.3 (12)                 | 66.7 (24)   | 2.808 | (0.854, 9.238) | 0.089   |
| UVR monitor                                        | 10.8 (4)                  | 89.2 (33)   | 0.776 | (0.191, 3.152) | 0.723   |
| <b>Sunscreen Use Weekend</b>                       |                           |             |       |                |         |
| Control                                            | 24.3 (9)                  | 75.7 (28)   | 1.00  |                | ref     |
| SunSmart App                                       | 30.6 (11)                 | 69.4 (25)   | 1.278 | (0.445, 3.673) | 0.649   |
| UVR monitor                                        | 10.8 (4)                  | 89.2 (33)   | 0.377 | (0.105, 1.357) | 0.135   |
| <b>12 weeks after the intervention<sup>d</sup></b> |                           |             |       |                |         |
| <b>Sunscreen Use over weekday and weekend</b>      |                           |             |       |                |         |
| Control                                            | 33.3 (12)                 | 66.7 (24)   | 1.00  |                | ref     |
| SunSmart App                                       | 37.1 (13)                 | 62.9 (22)   | 0.879 | (0.310, 2.491) | 0.808   |
| UVR monitor                                        | 27.8 (10)                 | 72.2 (26)   | 0.756 | (0.268, 2.137) | 0.598   |
| <b>Sunscreen Use Weekday</b>                       |                           |             |       |                |         |
| Control                                            | 30.6 (11)                 | 69.4 (25)   | 1.00  |                | ref     |
| SunSmart App                                       | 34.3 (12)                 | 65.7 (23)   | 0.839 | (0.286, 2.457) | 0.749   |
| UVR monitor                                        | 16.7 (6)                  | 83.3 (30)   | 0.407 | (0.122, 1.357) | 0.144   |
| <b>Sunscreen Use Weekend</b>                       |                           |             |       |                |         |
| Control                                            | 33.3 (12)                 | 66.7 (24)   | 1.00  |                | ref     |
| SunSmart App                                       | 31.4 (11)                 | 68.6 (24)   | 0.790 | (0.282, 2.211) | 0.653   |
| UVR monitor                                        | 33.3 (12)                 | 66.7 (24)   | 1.000 | (0.370, 2.700) | 0.999   |

<sup>a</sup> Yes = increase in percentage of days sunscreen used compared to baseline

<sup>b</sup> n=110 for the intervention measurement period

<sup>c</sup> n=109 for the 1 week after intervention measurement period

<sup>d</sup> n=107 for the 12 weeks after intervention measurement period

**Table S3 Proportion of participants who increased their physical activity levels**

| Timepoint                                          | Yes <sup>a</sup><br>% (n) | No<br>% (n) | OR    | (95% CI)       | p-value |
|----------------------------------------------------|---------------------------|-------------|-------|----------------|---------|
| <b>During Intervention<sup>b</sup></b>             |                           |             |       |                |         |
| Control                                            | 36.1 (13)                 | 63.9 (23)   | 1.00  |                | ref     |
| SunSmart App                                       | 30.6 (11)                 | 69.4 (25)   | 0.771 | (0.283, 2.098) | 0.611   |
| <b>1 week after the intervention<sup>c</sup></b>   |                           |             |       |                |         |
| Control                                            | 29.7 (11)                 | 70.3 (26)   | 1.00  |                | ref     |
| SunSmart App                                       | 16.7 (6)                  | 83.3 (30)   | 0.442 | (0.140, 1.398) | 0.165   |
| <b>12 weeks after the intervention<sup>d</sup></b> |                           |             |       |                |         |
| Control                                            | 41.7 (15)                 | 58.3 (21)   | 1.00  |                | ref     |
| SunSmart App                                       | 28.6 (10)                 | 71.4 (25)   | 0.555 | (0.202, 1.527) | 0.255   |
| <b>During Intervention<sup>b</sup></b>             |                           |             |       |                |         |
| Control                                            | 36.1 (13)                 | 63.9 (23)   | 1.00  |                | ref     |
| UVR monitor                                        | 23.7 (9)                  | 76.3 (29)   | 0.547 | (0.199, 1.505) | 0.243   |
| <b>1 week after the intervention<sup>c</sup></b>   |                           |             |       |                |         |
| Control                                            | 29.7 (11)                 | 70.3 (26)   | 1.00  |                | ref     |
| UVR monitor                                        | 37.8 (14)                 | 62.2 (23)   | 1.439 | (0.546, 3.791) | 0.462   |
| <b>12 weeks after the intervention<sup>d</sup></b> |                           |             |       |                |         |
| Control                                            | 41.7 (15)                 | 58.3 (21)   | 1.00  |                | ref     |
| UVR monitor                                        | 38.9 (14)                 | 61.1 (22)   | 0.891 | (0.347, 2.287) | 0.810   |

<sup>a</sup> Yes = increased percentage of days any physical activity undertaken compared to baseline

<sup>b</sup> n=110 for the intervention measurement period

<sup>c</sup> n=109 for the 1 week after intervention measurement period

<sup>d</sup> n=107 for the 12 weeks after intervention measurement period

**Table S4 Proportion of participants reporting high risk unprotected torso sun exposure**

|                            | Yes <sup>a</sup><br>% (n) | No <sup>b</sup><br>% (n) | OR (95% CI) <sup>3</sup> | p-value |
|----------------------------|---------------------------|--------------------------|--------------------------|---------|
| <b>Baseline</b>            |                           |                          |                          |         |
| Control                    | 23.1 (9)                  | 76.9 (30)                | 1.00                     | ref     |
| SunSmart App               | 22.5 (9)                  | 77.5 (31)                | 1.167 (0.398, 3.421)     | 0.779   |
| <b>End of Intervention</b> |                           |                          |                          |         |
| Control                    | 36.1 (13)                 | 63.9 (23)                | 1.00                     | ref     |
| SunSmart App               | 22.2 (8)                  | 77.8 (28)                | 1.939 (0.532, 7.064)     | 0.316   |
| <b>1 week Follow-up</b>    |                           |                          |                          |         |
| Control                    | 24.3 (9)                  | 75.7 (28)                | 1.00                     | ref     |
| SunSmart App               | 19.4 (7)                  | 80.6 (29)                | 1.483 (0.472, 4.659)     | 0.500   |
| <b>3 month Follow-up</b>   |                           |                          |                          |         |
| Control                    | 27.8 (10)                 | 72.2 (26)                | 1.00                     | ref     |
| SunSmart App               | 31.4 (11)                 | 68.6 (24)                | 1.070 (0.367, 3.118)     | 0.901   |
| <b>Baseline</b>            |                           |                          |                          |         |
| Control                    | 23.1 (9)                  | 76.9 (30)                | 1.00                     | ref     |
| UVR monitor                | 23.1 (9)                  | 76.9 (30)                | 1.000 (0.349, 2.869)     | 0.999   |
| <b>End of Intervention</b> |                           |                          |                          |         |
| Control                    | 36.1 (13)                 | 63.9 (23)                | 1.00                     | ref     |
| UVR monitor                | 21.1 (8)                  | 78.9 (30)                | 2.102 (0.744, 5.935)     | 0.161   |
| <b>1 week Follow-Up</b>    |                           |                          |                          |         |
| Control                    | 24.3 (9)                  | 75.7 (28)                | 1.00                     | ref     |
| UVR monitor                | 13.5 (5)                  | 86.5 (32)                | 2.064 (0.617, 6.906)     | 0.240   |
| <b>3 months Follow-Up</b>  |                           |                          |                          |         |
| Control                    | 27.8 (10)                 | 72.2 (26)                | 1.00                     | ref     |
| UVR monitor                | 16.7 (6)                  | 83.3 (30)                | 2.019 (0.619, 6.590)     | 0.244   |

<sup>a</sup>Yes= average daily minutes of unprotected torso exposure for the measurement period was less than baseline

<sup>b</sup>No= average daily minutes of unprotected torso exposure for the measurement period was higher than baseline or did not change 5% below baseline score  
n=118 participants with sun diary data

**Table S5 Proportion of participants who recorded a sunburn**

|                                        | Yes <sup>d</sup><br>% (n) | No <sup>e</sup><br>% (n) | OR (95% CI) <sup>c</sup> | p-value |
|----------------------------------------|---------------------------|--------------------------|--------------------------|---------|
| <b>Baseline<sup>a</sup></b>            |                           |                          |                          |         |
| Control                                | 12.8 (5)                  | 87.2 (34)                | 1.00                     | ref     |
| SunSmart App                           | 22.5 (9)                  | 77.5 (31)                | 0.491 (0.145, 1.662)     | 0.253   |
| <b>End of Intervention<sup>b</sup></b> |                           |                          |                          |         |
| Control                                | 30.6 (11)                 | 69.4 (25)                | 1.00                     | ref     |
| SunSmart App                           | 38.9 (14)                 | 61.1 (22)                | 0.691 (0.256, 1.869)     | 0.467   |
| <b>1 week Follow-Up<sup>a</sup></b>    |                           |                          |                          |         |
| Control                                | 16.2 (6)                  | 83.8 (31)                | 1.00                     | ref     |
| SunSmart App                           | 22.2 (8)                  | 77.8 (28)                | 0.643 (0.192, 2.153)     | 0.474   |
| <b>3 month Follow-up<sup>a</sup></b>   |                           |                          |                          |         |
| Control                                | 16.7 (6)                  | 83.3 (30)                | 1.00                     | ref     |
| SunSmart App                           | 28.6 (10)                 | 71.4 (25)                | 0.495 (0.153, 1.597)     | 0.239   |
| <b>Baseline<sup>a</sup></b>            |                           |                          |                          |         |
| Control                                | 12.8 (5)                  | 87.2 (34)                | 1.00                     | ref     |
| UVR monitor                            | 23.1 (9)                  | 76.9 (30)                | 0.488 (0.147, 1.624)     | 0.242   |
| <b>End of Intervention<sup>b</sup></b> |                           |                          |                          |         |
| Control                                | 30.6 (11)                 | 69.4 (25)                | 1.00                     | ref     |
| UVR monitor                            | 42.1 (16)                 | 57.9 (22)                | 0.602 (0.230, 1.570)     | 0.299   |
| <b>1 week Follow-Up<sup>a</sup></b>    |                           |                          |                          |         |
| Control                                | 16.2 (6)                  | 83.8 (31)                | 1.00                     | ref     |
| UVR monitor                            | 16.2 (6)                  | 83.3 (31)                | 1.000 (0.290, 3.450)     | 0.999   |
| <b>3 months Follow-Up<sup>a</sup></b>  |                           |                          |                          |         |
| Control                                | 16.7 (6)                  | 83.3 (30)                | 1.00                     | ref     |
| UVR monitor                            | 19.4 (7)                  | 80.6 (29)                | 0.824 (0.243, 2.797)     | 0.756   |

<sup>a</sup>= Measurement period 2 week duration, <sup>b</sup>= Measurement period 4 week duration.

<sup>c</sup>odds of 1 or more sunburns in the intervention groups compared to the control group.

<sup>d</sup>Yes= 1 or more sunburns recorded during measurement period.

<sup>e</sup>No= sunburn not recorded during measurement period.

n=118 participants with sun diary data.

**Table S6 Proportion of participants who recorded intentionally seeking a suntan**

|                                       | Yes <sup>d</sup><br>% (n) | No <sup>e</sup><br>% (n) | Suntan<br>OR (95% CI) <sup>c</sup> | p-value |
|---------------------------------------|---------------------------|--------------------------|------------------------------------|---------|
| <b>Baseline<sup>a</sup></b>           |                           |                          |                                    |         |
| Control                               | 7.7 (3)                   | 92.3 (36)                |                                    | ref     |
| SunSmart App                          | 10.0 (4)                  | 90.0 (36)                | 0.955 (0.193, 4.717)               | 0.954   |
| <b>Intervention<sup>b</sup></b>       |                           |                          |                                    |         |
| Control                               | 19.4 (7)                  | 80.6 (29)                |                                    | ref     |
| SunSmart App                          | 8.3 (3)                   | 91.7 (33)                | 2.901 (0.669, 12.577)              | 0.155   |
| <b>1 week Follow-Up<sup>a</sup></b>   |                           |                          |                                    |         |
| Control                               | 10.8 (4)                  | 89.2 (33)                |                                    | ref     |
| SunSmart App                          | 8.3 (3)                   | 91.7 (33)                | 1.534 (0.309, 7.622)               | 0.601   |
| <b>3 month Follow-up<sup>a</sup></b>  |                           |                          |                                    |         |
| Control                               | 8.3 (3)                   | 91.7 (33)                |                                    | ref     |
| SunSmart App                          | 17.1 (6)                  | 82.9 (29)                | 0.575 (0.127, 2.603)               | 0.473   |
| <b>Baseline<sup>a</sup></b>           |                           |                          |                                    |         |
| Control                               | 7.7 (3)                   | 92.3 (36)                |                                    | ref     |
| UVR monitor                           | 7.7 (3)                   | 92.3 (36)                | 1.000 (0.182, 5.507)               | 0.999   |
| <b>Intervention<sup>b</sup></b>       |                           |                          |                                    |         |
| Control                               | 19.4 (7)                  | 80.6 (29)                |                                    | ref     |
| UVR monitor                           | 21.1 (8)                  | 78.9 (30)                | 0.876 (0.277, 2.770)               | 0.822   |
| <b>1 week Follow-Up<sup>a</sup></b>   |                           |                          |                                    |         |
| Control                               | 10.8 (4)                  | 89.2 (33)                |                                    | ref     |
| UVR monitor                           | 5.4 (2)                   | 94.6 (35)                | 2.142 (0.364, 12.623)              | 0.400   |
| <b>3 months Follow-Up<sup>a</sup></b> |                           |                          |                                    |         |
| Control                               | 8.3 (3)                   | 91.7 (33)                |                                    | ref     |
| UVR monitor                           | 5.6 (2)                   | 94.4 (34)                | 1.575 (0.238, 10.437)              | 0.638   |

<sup>a</sup>= Measurement period 2 week duration, <sup>b</sup>= Measurement period 4 week duration.

<sup>c</sup>odds of 1 or more suntans in the intervention groups compared to the control group.

<sup>d</sup>Yes= seeking a suntan 1 or more times during measurement period.

<sup>e</sup>No= seeking a suntan not recorded during measurement period.

n=118 participants with sun diary data.

|                                                                                    | SunSmart App<br>n=35 |      | UVR Monitor<br>n=36 |      |
|------------------------------------------------------------------------------------|----------------------|------|---------------------|------|
|                                                                                    | %                    | (n)  | %                   | (n)  |
| Did you find the device helpful to guide your sun protective behaviour?            |                      |      |                     |      |
| Yes                                                                                | 65.7                 | (23) | 63.9                | (23) |
| No                                                                                 | 34.3                 | (12) | 36.1                | (13) |
| Did you change or modify your behaviour in response to the output from the device? |                      |      |                     |      |
| Yes                                                                                | 54.3                 | (19) | 47.2                | (17) |
| No                                                                                 | 45.7                 | (16) | 52.8                | (19) |
| Would you purchase or download the device after the study?                         |                      |      |                     |      |
| Yes                                                                                | 40.0                 | (14) | 19.4                | (7)  |
| No                                                                                 | 60.0                 | (21) | 80.6                | (29) |
| Would you recommend the device to a friend or family member?                       |                      |      |                     |      |
| Yes                                                                                | 65.7                 | (23) | 52.8                | (19) |
| No                                                                                 | 34.3                 | (12) | 47.2                | (17) |
| The device was encouraging                                                         |                      |      |                     |      |
| Agree/Strongly Agree                                                               | 62.9                 | (22) | 47.2                | (17) |
| Unsure                                                                             | 17.1                 | (6)  | 16.7                | (6)  |
| Disagree/Strongly Disagree                                                         | 20.0                 | (7)  | 36.1                | (13) |
| The device was repeating what I already know                                       |                      |      |                     |      |
| Agree/Strongly Agree                                                               | 60.0                 | (21) | 36.1                | (13) |
| Unsure                                                                             | 17.1                 | (6)  | 25.0                | (9)  |
| Disagree/Strongly Disagree                                                         | 22.9                 | (8)  | 36.1                | (13) |
| Missing                                                                            | -                    | -    | 2.8                 | (1)  |

**Table S7 Satisfaction with Intervention Devices**
